# Supplementary material for: Von Hippel-Lindau Protein Is Required for Optimal Alveolar Macrophage Terminal Differentiation, Self-Renewal, and Function
Source: PubMed Central journal article supplement — Cell Rep. 2018 Aug 14;24(7):1738–46. doi: 10.1016/j.celrep.2018.07.034 (PMC6113928; doi:10.1016/j.celrep.2018.07.034), 2018-08-14
Supplement: mmc1.pdf [file mmc1.pdf]

**Cell Reports, Volume 24**

**Supplemental Information**

**Von Hippel-Lindau Protein Is Required for Optimal  
Alveolar Macrophage Terminal Differentiation,  
Self-Renewal, and Function**

**Helena M. Izquierdo, Paola Brandi, Manuel-José Gómez, Ruth Conde-Garrosa, Elena Priego, Michel Enamorado, Sarai Martínez-Cano, Iria Sánchez, Laura Conejero, Daniel Jimenez-Carretero, Silvia Martín-Puig, Martin Williams, and David Sancho**

- 1 **SUPPLEMENTAL INFORMATION**
- 2 Figures S1-S3
- 3 Supplemental Experimental Procedures
- 4 Supplemental References

1  
2

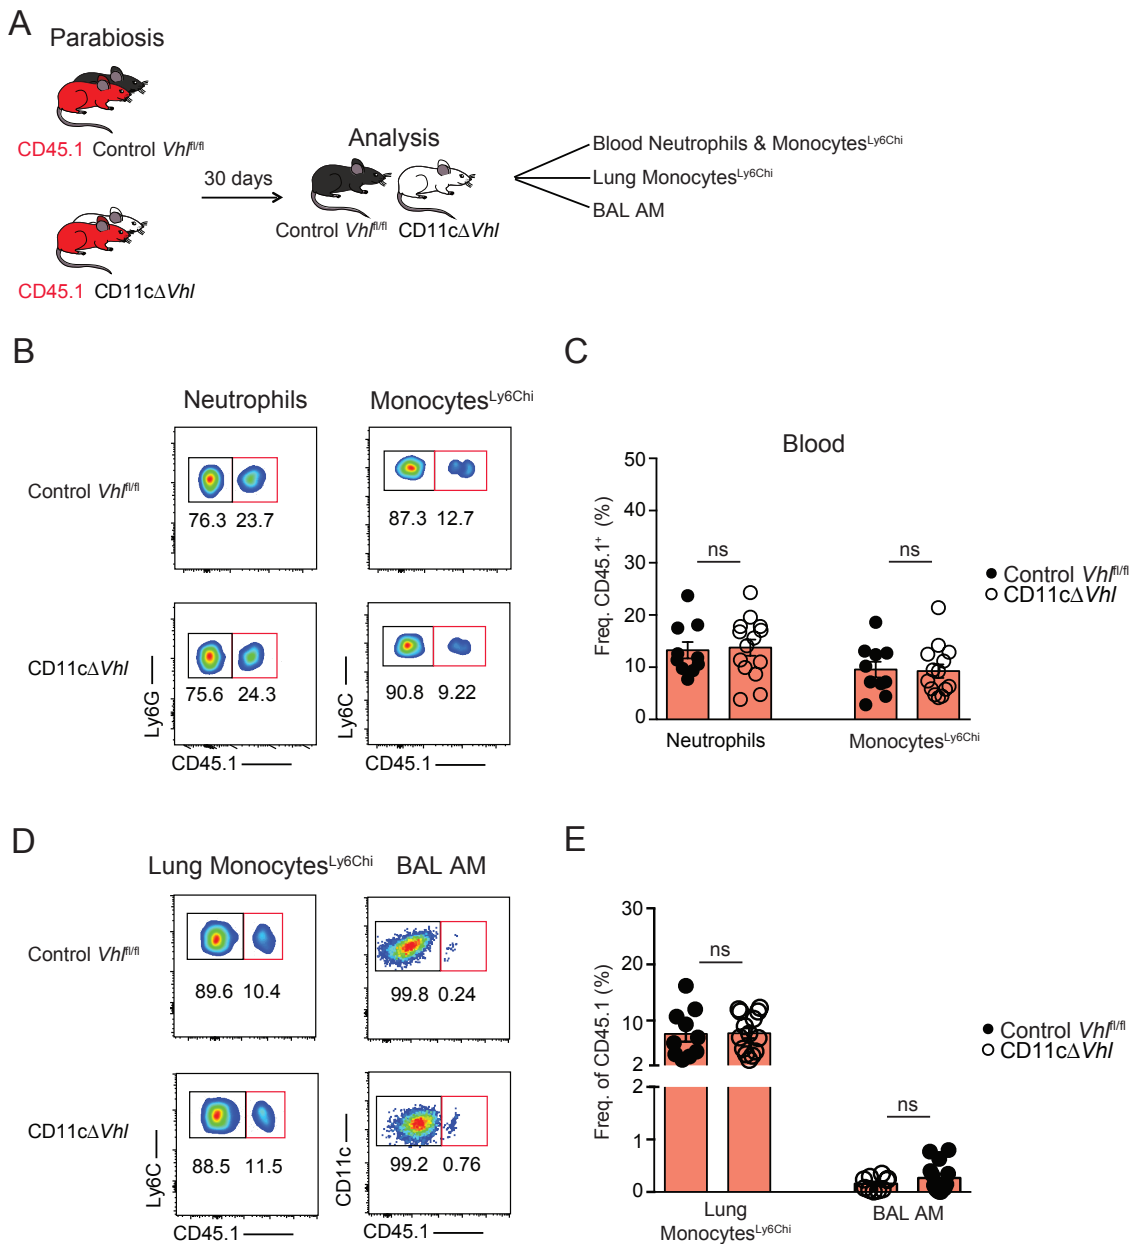

3  
4 **Figure S1. Circulating monocytes do not contribute to *Vhl*-deficient AM phenotype. Related to Figure 2.**  
5 (A) Scheme of parabiosis: CD45.2 control *Vhl*<sup>fl/fl</sup> and CD11cΔ*Vhl* mice were surgically joined to a CD45.1 mouse in  
6 parabiosis. Thirty days after surgery, CD45.2 parabionts were analyzed.  
7 (B, C) Representative flow cytometry plots (B) and frequencies of CD45.1<sup>+</sup> cells (C) in neutrophils (gated on  
8 CD11b<sup>+</sup>Ly6G<sup>+</sup>) and Ly6C<sup>hi</sup> monocytes (gated on CD11b<sup>+</sup>Ly6C<sup>hi</sup>) from peripheral blood.  
9 (D, E) Representative flow cytometry plots (D) and frequencies of CD45.1<sup>+</sup> cells (E) in lung Ly6C<sup>hi</sup> monocytes  
10 (gated on CD45<sup>+</sup> Siglec-F<sup>-</sup> CD11b<sup>+</sup> Ly6C<sup>hi</sup>) and BAL AMs (gated on Siglec-F<sup>+</sup> CD11c<sup>+</sup>).  
11 (C, E) Frequencies shown as mean ± s.e.m. of a pool of three independent experiments performed, where each dot  
12 represents an individual mouse (n=10-14 per genotype): ns, not significant (unpaired Student *t*-test).  
13  
14

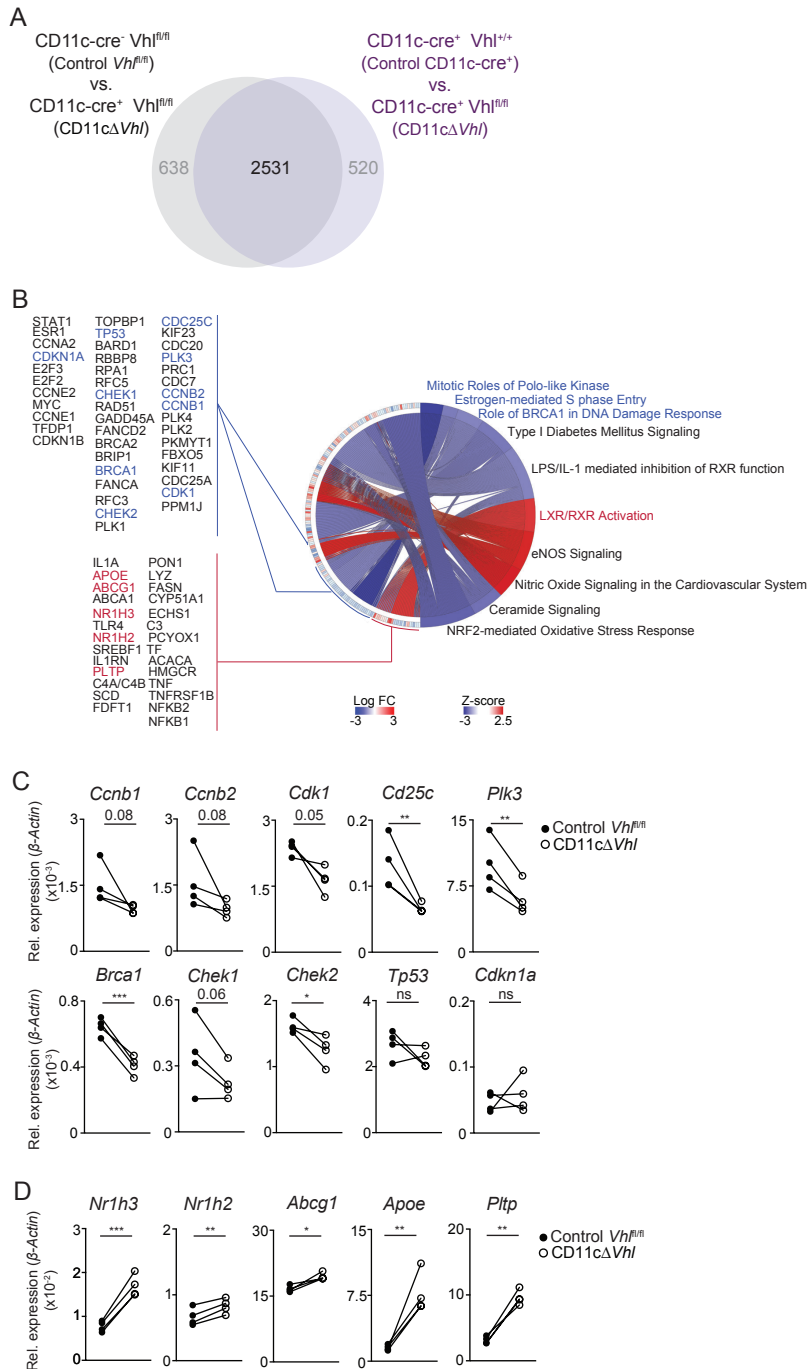

**Figure S2. VHL-deficient AMs have an altered gene expression profile. Related to Figures 3 and 4.**

(A) Venn diagram showing genes differentially expressed in CD11cΔVhl AMs versus control Vhl<sup>fl/fl</sup> AMs or control CD11c-cre<sup>+</sup>.

(B) Circular plot representing Ingenuity Pathway Analysis of differentially expressed genes from pathways with |Z-score| > 2 and -log (B-H p-value) > 2.5 in VHL-deficient AMs (CD11cΔVhl) versus control Vhl<sup>fl/fl</sup> AMs from BAL. Depicted genes correspond to cell-cycle-related (blue) and lipid-handling-related (red) pathways.

(C,D) Quantitative PCR of selected differentially expressed genes related to cell cycle (C) and lipid sensing (D), depicted in blue and red, respectively, in Figure S2B. ns, not significant; \*p-value<0.05; \*\*p-value<0.01; \*\*\*p-value<0.001 by ratio paired Student *t*-test.

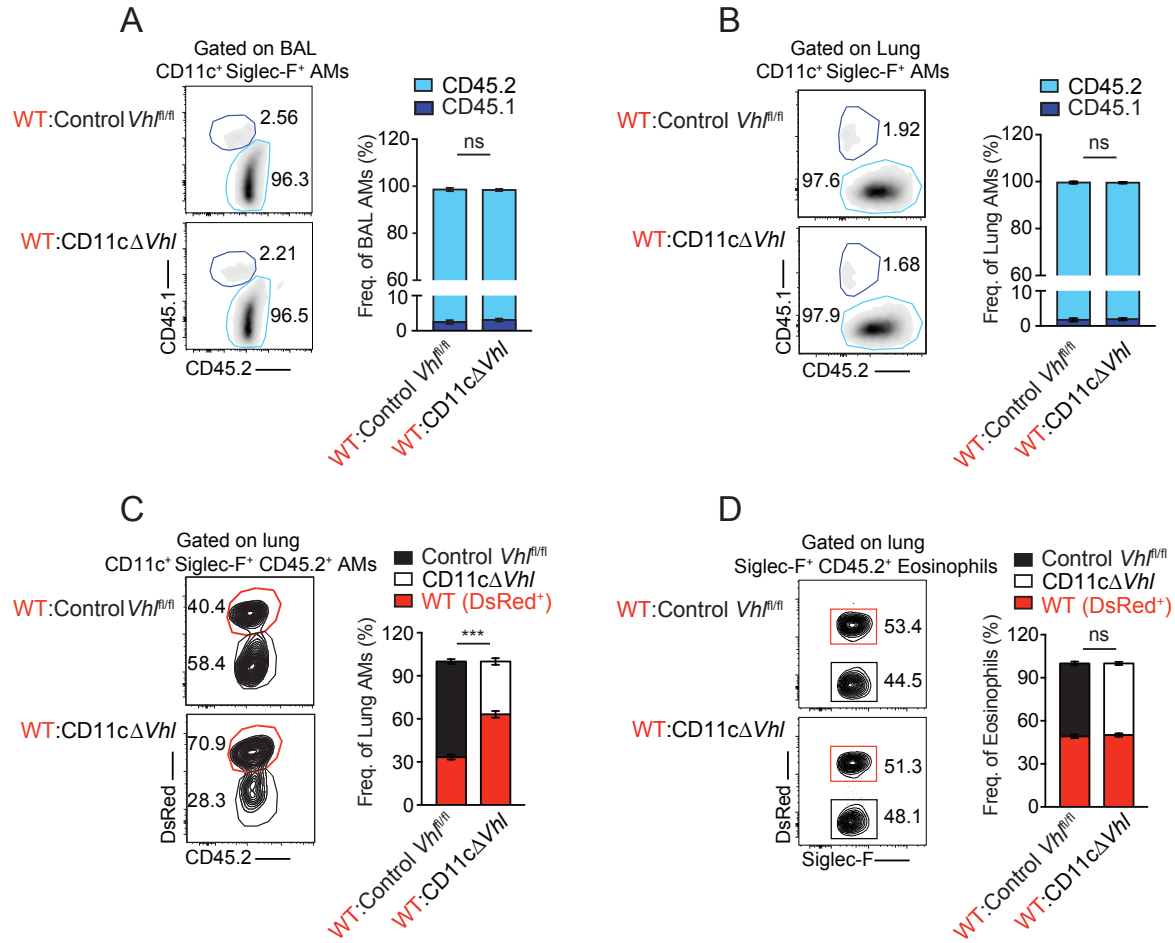

1  
2 **Figure S3. VHL-deficient AMs have a cell autonomous defect in lung reconstitution. Related to Figure 3.**  
3 (A-B) Representative flow cytometry plots and frequencies of host CD45.1<sup>+</sup> cells and donor CD45.2<sup>+</sup> cells in BAL  
4 AMs (A) and lung AMs (after BAL) (B) from BM chimeras.  
5 (C-D) Representative flow cytometry plots and frequencies of DsRed<sup>+</sup> (WT) and DsRed<sup>-</sup> (Control *Vhl*<sup>fl/fl</sup> or  
6 CD11cΔ*Vhl*) cells (normalized to blood Ly6Chi monocyte frequency in each mouse and genotype) in CD45.2<sup>+</sup> lung  
7 AMs (C) and lung eosinophils (D) from BM chimeras. Frequencies shown as mean ± s.e.m. of one experiment of  
8 three independent experiments performed (n=5-10 per genotype): ns, not significant; \*\*\*p-value<0.001 by ratio  
9 paired Student *t*-test.

1 **SUPPLEMENTAL EXPERIMENTAL PROCEDURES**

2

3 **Quantitative-qPCR**

4 Quantitative PCR was performed in a 7900-FAST-384 instrument (Applied Biosystems) by  
5 using the GoTaq qPCR master mix from Promega (Madison, WI)

6 Primers used in this work (synthesized by Sigma) were as follows:

7 *β-actin* Fw: 5'-GGCTGTATTCCCCTCCATCG-3', *β-actin* Rv: 5'-  
8 CCAGTTGGTAACAATGCCATGT-3', *Vhl* Fw: 5'-TGTGCCATCCCTCAATGTCG-3', *Vhl*  
9 Rv: 5'-CTTCCGCACACTGGGTAGT-3', *Slc2a1* Fw: 5'-GGGCATGTGCTTCCAGTATGT-3',  
10 *Slc2a1* Rv: 5'-ACGAGGAGCACCGTGAAGAT-3', *Ldha* Fw: 5'-  
11 TGTCTCCAGCAAAGACTACTGT-3', *Ldha* Rv: 5'-GACTGTACTTGACAATGTTGGGA-3',  
12 *Arg1* Fw: 5'-CTCCAAGCCAAAGTCCTTAGAG-3' , *Arg1* Rv: 5'-  
13 AGGAGCTGTCATTAGGGACATC-3', *Itgax* Fw: 5'-AGTGCTAGGGGACGTGAATG-3',  
14 *Itgax* Rv: 5'-TCTGGGATGCTGAAATCCTC-3' , *Siglec5* Fw: 5'-  
15 TTACCTGGCACTGGTGTACTG-3', *Siglec5* Rv: 5'-ATCTGCAGAGATGCTCCACTC-3',  
16 *Fcgr1* Fw: 5'-GACAGTGGCGAATACAGGTGT-3', *Fcgr1* Rv: 5'-  
17 ATGGCGACCTCCGAATCTGA-3', *Itgam* Fw: 5'-ATGGACGCTGATGGCAATACC-3', *Itgam*  
18 Rv: 5'-TCCCCATTCACGTCTCCCA-3', *Ccnb1* Fw: 5'-AAGGTGCCTGTGTGTGAACC-3',  
19 *Ccnb1* Rv: 5'-GTCAGCCCCATCATCTGCG-3', *Ccnb2* Fw: 5'-  
20 GCCAAGAGCCATGTGACTATC-3', *Ccnb2* Rv: 5'-CAGAGCTGGTACTTTGGTGTTC-3',  
21 *Cdk1* Fw: 5'-AGAAGGTACTTACGGTGTGGT-3', *Cdk1* Rv: 5'-  
22 GAGAGATTTCCCGAATTGCAGT-3', *Cd25c* Fw: 5'-AGCGTAGCACATCTGCACATA-3',  
23 *Cd25c* Rv: 5'-AGGAACCGTAGTAATGGGACTG-3', *Plk3* Fw: 5'-  
24 GCACATCCATCGGTCATCCAG-3', *Plk3* Rv: 5'-GCCACAGTCAAACCTTCTTCAA-3',

1 *Brcal* Fw: 5'-AGGAGGCGTCGATCATCCA-3', *Brcal* Rv: 5'-  
2 ACAGATTTCTTTCGAGGTTGGG-3', *Chek1* Fw: 5'-TTCCACCAACTCATGGCAGG-3',  
3 *Chek1* Rv: 5'-GCGTTCACGATTATTATGCCGAA-3', *Chek2* Fw: 5'-  
4 GATCATTAGCAAGCGGAGGTT-3', *Chek2* Rv: 5'-CACCACCCGGTCAAATAGTTC-3',  
5 *Tp53* Fw: 5'-CTCTCCCCCGCAAAGAAAAA-3', *Tp53* Rv: 5'-  
6 CGGAACATCTCGAAGCGTTTA-3', *Cdkn1a* Fw: 5'-CCTGGTGATGTCCGACCTG-3',  
7 *Cdkn1a* Rv: 5'-CCATGAGCGCATCGCAATC-3', *Nr1h3* Fw: 5'-  
8 CTCAATGCCTGATGTTTCTCCT-3', *Nr1h3* Rv: 5'-TCCAACCCTATCCCTAAAGCAA-3',  
9 *Nr1h2* Fw: 5'-CGTGGTCATCTTAGAGCCAGA-3', *Nr1h2* Rv: 5'-  
10 GCTGAGCACGTTGTAGTGGAA-3', *Abcg1* Fw: 5'-CTTTCCTACTCTGTACCCGAGG-3',  
11 *Abcg1* Rv: 5'-CGGGGCATTCCATTGATAAGG-3', *Apoe* Fw: 5'-  
12 CTGACAGGATGCCTAGCCG-3', *Apoe* Rv: 5'-CGCAGGTAATCCCAGAAGC-3', *Pltp* Fw:  
13 5'-CGCAAAGGGCCACTTTTACTA-3', *Pltp* Rv: 5'-GCCCCCATCATATAAGAACCAG-3'.

14 mRNA levels are shown as relative expression to  $\beta$ -actin ( $\Delta\Delta Ct$ ) as indicated in figure legends.

## 15 **Metabolic measurements**

16 Seahorse assays were performed in DMEM supplemented with 2mM L-glutamine, 100  $\mu$ g/ml  
17 streptomycin, phenol red and 25mM glucose + 1mM pyruvate or 5mM L-carnitine + 50  $\mu$ M  
18 palmitoyl-CoA. The pH was adjusted to 7.4 with KOH.  $2.5 \times 10^5$  AMs were plated in 180 $\mu$ l of  
19 seahorse media per well in 3-10 replicates. Three consecutive measurements were performed  
20 under basal conditions and after the sequential addition of the following mitochondrial electron  
21 transport chain (mETC) inhibitors: 1 $\mu$ M oligomycin. 1 $\mu$ M carbonyl cyanide m-chlorophenyl  
22 (CCCP), 1 $\mu$ M rotenone and 1 $\mu$ M antimycin A (Sigma-Aldrich). Basal respiration rate (BRR)

1 was defined as OCR in the absence of any inhibitor. Basal ECAR (ECAR) was measured in the  
2 absence of drugs.

### 3 **Lung cell suspension preparation**

4 Adult lungs were collected in RPMI, cut into small pieces, and enzyme digested at 37°C with  
5 Liberase TM (Sigma-Aldrich) for 30 min. Cells were passed through a 70µm cell strainer  
6 (Falcon) and washed with flow cytometry buffer. After red blood cell lysis, cells were  
7 centrifuged and resuspended in 1ml of cold flow cytometry buffer. Cells were counted with  
8 CASYton cell counter (Roche Innovatis) and stained for flow cytometry analysis.

### 9 **Flow cytometry stainings**

10 CD16/CD32 (TONBO bioscience, San Diego, CA) was used to reduce non-specific binding. The  
11 following Abs were used for the analysis of AM surface expression profile: anti-CD11c-Brilliant  
12 Violet 510 (HL3, BD Biosciences), anti-Siglec-F-PE, anti-Siglec-F-PerCP-Cy5.5, anti-Siglec-F-  
13 BV421 or anti-Siglec-F-Alexa Fluor 647 (All of them: clone E50-2440, BD Biosciences), anti-  
14 CD64-APC (X54-5/7.1, BD Biosciences), anti-CD11b-PE-Cy7 (M1/70, BD Biosciences), anti-  
15 CD115-biotin (AFS98, eBiosciences), Streptavidin-APC (eBiosciences). During the analysis, we  
16 realized that control *Vhl<sup>fl/fl</sup>* and CD11cΔ*Vhl* AMs had a distinct intrinsic autofluorescence (AUF),  
17 thus, we used Spectral analyzer software to normalize GMOF for each fluorochrome based on  
18 genotype-specific AUF. The following Abs were used for lung staining: anti-CD45-PerCP-Cy5.5  
19 (30-F11, eBiosciences) or anti-CD45-BV570 (30-F11, Biolegend), anti-CD45.1-APC (A20,  
20 eBiosciences), anti-F4/80 biotin (BM8, Life Technologies), anti-CD11c, anti-Siglec-F, anti-  
21 CD11b, anti-I-A/I-E-FITC (2G9, BD Biosciences) or anti-I-A/I-E-APC (M5/114.15.2, BD  
22 Biosciences), anti-Ly6G-APC or anti-Ly6G-PE (1A8, BD Pharmingen), and anti-Ly6C-FITC  
23 (AL-21, BD Biosciences). The following Abs were used for blood staining: anti-CD45.1-APC,



1 anti-Ly6G-PE, anti-Ly6C-FITC and anti-CD11b-PerCP-Cy5.5 (M1/70, eBiosciences). Hoechst  
2 33258 (Invitrogen) was used at 0.1 $\mu$ M as a counterstain to exclude dead cells. Lung AM  
3 population was defined as: CD45<sup>+</sup>, F4/80<sup>+</sup>, CD11c<sup>+</sup>, Siglec-F<sup>+</sup>, CD11b<sup>-/mid</sup>, I-A/I-E<sup>lo</sup>. Blood and  
4 lung monocytes were defined as: CD45<sup>+</sup>, CD11b<sup>hi</sup>, Ly6G<sup>-</sup>, Ly6C<sup>hi</sup>. For *intracellular Ki67*  
5 *staining*, same AM number were stained for surface markers, washed twice and mixed with  
6 unstained thymocytes, used as a cell carrier. Just after, cells were fixed and permeabilized using  
7 the FoxP3 staining buffer set (eBiosciences), and then stained with anti-Ki67-eFluor 660  
8 (SolA15, eBiosciences) or isotype control Rat IgG2 $\alpha$ k (eBR2a, eBiosciences). For *intracellular*  
9 *BrdU staining*, AMs were stained and mixed with carrier cells as explained above, and then fixed  
10 and permeabilized using the BrdU staining set (BD Pharmingen). Then, cells were treated with  
11 DNase and stained with anti-BrdU Ab (BD Pharmingen).

12

### 13 **Bioinformatics Analysis**

#### 14 ***GSE60249 array data***

15 Gene Set Enrichment Analysis (GSEA; <http://software.broadinstitute.org/gsea>) was used  
16 to identify enriched gene sets from the hallmark collection of the Molecular Signature Database  
17 (MsigDB; <http://software.broadinstitute.org/gsea/msigdb>). Enriched gene sets were identified  
18 using a weighted enrichment statistic and a log<sub>2</sub> ratio metric for ranking genes. Significance was  
19 defined by FDR q value < 0.25, obtained after one thousand phenotype permutations.

20 Heatmaps were generated with Heatmapper (Babicki et al., 2016), using no clustering method  
21 and Euclidean as distance measurement method.

#### 22 **RNASeq**

23 *Differential expression analysis.*

1 Sequencing reads were pre-processed by means of a pipeline that used FastQC  
2 ([www.bioinformatics.babraham.ac.uk/projects/fastqc](http://www.bioinformatics.babraham.ac.uk/projects/fastqc)) to assess read quality, and Cutadapt v1.6  
3 (<http://journal.embnnet.org/index.php/embnnetjournal/article/view/200>) to trim sequencing reads,  
4 eliminate Illumina adaptor remains, and to discard reads that were shorter than 30 base pairs. The  
5 resulting reads were mapped against the mouse transcriptome (GRCm38 assembly, Ensembl  
6 release 76) and quantified using RSEM v1.2.3 (Li and Dewey, 2011). Raw expression counts  
7 were then processed with an analysis pipeline that used the Bioconductor package EdgeR  
8 (Robinson et al., 2010) for normalization (using TMM method) and differential expression  
9 testing. Only genes expressed at a minimal level of 1 count per million, in at least 3 samples,  
10 were considered for differential expression analysis. Changes in gene expression were  
11 considered significant if associated to a Benjamini and Hochberg adjusted p-value  $< 0.05$ .

12 *Functional analysis.* Collections of differentially expressed genes were analyzed with Ingenuity  
13 Pathway Analysis (<https://www.qiagenbioinformatics.com/products/ingenuity-pathway-analysis>)  
14 to determine significant associations to canonical pathways, biological functions and upstream  
15 transcriptional regulators; significance was defined by a Benjamini and Hochberg adjusted p-  
16 value  $< 0.05$ . GOrilla and ReViGO were used to identify and summarize Gene Ontology terms  
17 enriched in the collections of differentially expressed genes; significance was defined by FDR q  
18 value  $< 0.05$ . Venn diagram was generated by term lists comparison with Venny  
19 (<http://bioinfogp.cnb.csic.es/tools/venny/index.html>) to identify and visualize specific and shared  
20 elements. Circular plots representing the association between genes and enriched functional  
21 categories were generated with GOplot. GSEA was used to identify enriched gene sets, from the  
22 hallmark collection of MSigDB, having up-regulated and down-regulated genes, using a

1 weighted enrichment statistic and a log<sub>2</sub> ratio metric for ranking genes. Significance was defined  
2 by FDR q value < 0.25, obtained after one thousand phenotype permutations.

### 3 **BCA protein measurement**

4 Total protein concentration was determined using Pierce BCA Protein Assay Kit (Thermo  
5 Scientific) according to the manufacturer's instruction. Albumin (Thermo scientific) was used as  
6 standard.

### 7 **ELISA surfactant protein D**

8 SP-D DUO ELISA kit and capture/detection antibodies were from R&D Systems. It was used  
9 according to manufacturer's instructions. Detection antibody was biotinylated and labeled with  
10 streptavidin-conjugated horseradish peroxidase (HRP) and visualized by incubation with 5,5'-  
11 tetramethylbenzidine solution (TMB, KPL). Reaction was stopped with TMB-stop solution  
12 (KPL). Recombinant SP-D served as standard and was included in the kit. Optical density was  
13 determined using a microplate reader (Benchmark Plus, Bio-Rad) set to 450 nm subtracting  
14 absorbance at 570 nm (wavelength correction).

### 15 **Alveolar macrophage (AM) culture**

16 - BrdU in vitro Assay, 2x10<sup>5</sup> BAL AMs from pools of mice (n=5-6 mice per pool and genotype)  
17 were plated in triplicates (one replicate per condition: RPMI, M-CSF and rGM-CSF) in non-  
18 tissue cultured treated 24well-plates (Falcon) in 1.5 ml per well of complete RPMI and  
19 stimulated with rM-CSF and rGM-CSF (both from Peprotech) at a final concentration of 1 ng/ml  
20 and 10 pg/ml, respectively. After 12h and 36h, AMs were pulsed with BrdU at 10μM (BD  
21 Pharmingen). 24h after last pulse, cells were washed with PBS and incubated with accutase  
22 (StemCell Technologies) at 37°C. After 20 min, cells were detached, counted and stained for  
23 surface markers and BrdU.

1 - Cell morphology analysis,  $2 \times 10^5$  AMs from individual mice (n=4-5) were cultured on crystals  
2 previously sterilized with UV radiation and placed in 24well-plates in complete RPMI at 37°C  
3 and 5% CO<sub>2</sub>. After 5 days, cells were fixed for 10 min with paraformaldehyde (PFA) 4%  
4 (Thermo Fisher) at RT. Crystals were stained with Hematoxylin and Eosin.

#### 5 **Cell image acquisition & analysis**

6 Cells were examined with a Leica DM 2500 light microscope and images captured with a Leica  
7 DFC 420 digital camera. At least 3 images of different fields of a single mouse sample were  
8 acquired and further analyzed. Image processing and quantification of AM size and circularity  
9 were developed as a macro in Fiji (ImageJ 1.50e x64). A first preprocessing step converts the  
10 10X color image into grayscale, applies a gaussian blurring (sigma=3), and normalizes it in order  
11 to reduce noise and standardize the intensity values. An initial segmentation of objects is done  
12 using a marker-controlled watershed algorithm (Legland et al., 2016) trying to maximize the  
13 differential detection of cells closely situated or clustered, without over-segmenting elongated  
14 cells as multiple objects. “Marker” and “mask” images used to that end were created by  
15 automatic thresholding using Minimum and Otsu implementations respectively, followed by  
16 morphological operations in order to condense the segmented objects and discard noisy elements  
17 (hole filling, closing, area opening, and removal of objects partially detected in the boundaries).  
18 The stricter first threshold allows a proper definition of seed locations (“marker”) and the more  
19 permissive Otsu method achieves robust and accurate segmentation of complete macrophages  
20 (“mask”). Objects segmented in “mask” image and split by the explained watershed strategy are  
21 later filtered to discard mistakes (dirtiness and shadows typical of the image modality), by  
22 removing those ones where the ratio between mean intensity inside the object and its 10-pixel  
23 outer-ring is lower than 120% and with dimensions very far from the typical values. Circularity

1  $(4\pi \cdot \text{area}/\text{perimeter}^2)$  and size are measured for each final detected cell and mean values are  
2 reported for each individual image. Statistical analysis was performed comparing average of the  
3 mean values obtained from groups of at least 5 mice per genotype and/or condition.

4

## 5 **Supplemental References**

6

7 Babicki, S., Arndt, D., Marcu, A., Liang, Y., Grant, J.R., Maciejewski, A., and Wishart, D.S.  
8 (2016). Heatmapper: web-enabled heat mapping for all. *Nucleic Acids Res* *44*, W147-153.

9

10 Legland, D., Arganda-Carreras, I., and Andrey, P. (2016). MorphoLibJ: integrated library and  
11 plugins for mathematical morphology with ImageJ. *Bioinformatics* *32*, 3532-3534.

12

13 Li, B., and Dewey, C.N. (2011). RSEM: accurate transcript quantification from RNA-Seq data  
14 with or without a reference genome. *BMC Bioinformatics* *12*, 323.

15

16 Robinson, M.D., McCarthy, D.J., and Smyth, G.K. (2010). edgeR: a Bioconductor package for  
17 differential expression analysis of digital gene expression data. *Bioinformatics* *26*, 139-140.

18
